# Supplementary material for: Does the Consumer Sociodemographic Profile Influence the Perception of Aspects Related and Not Related to Food Safety? A Study in Traditional Spanish Street Markets
Source: Int J Environ Res Public Health. 2021 Sep 17;18(18):9794. doi: 10.3390/ijerph18189794 (PMC8470163; doi:10.3390/ijerph18189794)
Supplement: Supplementary file 1 [file ijerph-18-09794-s001.zip › ijerph-1339815-supplementary.pdf]

| SURVEY OF HYGIENIC-SANITARY CONDITIONS AND CONSUMER SATISFACTION IN TRADITIONAL STREET MARKTS                                                  |                                                                                                            |                                         |                                        |                                  |                                 |
|------------------------------------------------------------------------------------------------------------------------------------------------|------------------------------------------------------------------------------------------------------------|-----------------------------------------|----------------------------------------|----------------------------------|---------------------------------|
| Please, mark your group <i>of sociodemographic profile</i> in each item.                                                                       |                                                                                                            |                                         |                                        |                                  |                                 |
| 1                                                                                                                                              | Gender                                                                                                     | <input type="radio"/> Male              |                                        | <input type="radio"/> Female     |                                 |
| 2                                                                                                                                              | Age (years)                                                                                                | <input type="radio"/> 18 - 30           | <input type="radio"/> 31 - 59          | <input type="radio"/> > 60       |                                 |
| 3                                                                                                                                              | Level of education                                                                                         | <input type="radio"/> First / Secondary | <input type="radio"/> VT / Higher Sec. | <input type="radio"/> University |                                 |
| 4                                                                                                                                              | Occupational Status                                                                                        | <input type="radio"/> Student           | <input type="radio"/> Worker           | <input type="radio"/> Unemployed | <input type="radio"/> Pensioner |
| Please, rate each item in order to evaluate this Traditional Street Market<br>(1 point is very bad / disagree, 10 points is very good / agree) |                                                                                                            |                                         |                                        |                                  |                                 |
|                                                                                                                                                |                                                                                                            |                                         |                                        | SCORE                            | MAX. SCORE                      |
| 5                                                                                                                                              | Products                                                                                                   |                                         |                                        | -                                | 50                              |
| 5.1.                                                                                                                                           | Quality of the products                                                                                    |                                         |                                        |                                  | 10                              |
| 5.2.                                                                                                                                           | Labelling / Information of the products                                                                    |                                         |                                        |                                  | 10                              |
| 5.3.                                                                                                                                           | Variety of products                                                                                        |                                         |                                        |                                  | 10                              |
| 5.4.                                                                                                                                           | Local / Artisan products                                                                                   |                                         |                                        |                                  | 10                              |
| 5.5.                                                                                                                                           | Freshness of the products                                                                                  |                                         |                                        |                                  | 10                              |
| 6                                                                                                                                              | Prices                                                                                                     |                                         |                                        | -                                | 30                              |
| 6.1.                                                                                                                                           | Quality / Cost Ratio                                                                                       |                                         |                                        |                                  | 10                              |
| 6.2.                                                                                                                                           | You choose food depending on the price                                                                     |                                         |                                        |                                  | 10                              |
| 6.3.                                                                                                                                           | You associate higher prices to higher quality                                                              |                                         |                                        |                                  | 10                              |
| 7                                                                                                                                              | Professionalism / Customer care                                                                            |                                         |                                        | -                                | 40                              |
| 7.1.                                                                                                                                           | Received treatment from the staff                                                                          |                                         |                                        |                                  | 10                              |
| 7.2.                                                                                                                                           | Waiting time                                                                                               |                                         |                                        |                                  | 10                              |
| 7.3.                                                                                                                                           | Information / Advice during shopping                                                                       |                                         |                                        |                                  | 10                              |
| 7.4.                                                                                                                                           | The staff is looking after customers                                                                       |                                         |                                        |                                  | 10                              |
| 8                                                                                                                                              | Food Handlers Training                                                                                     |                                         |                                        | -                                | 40                              |
| 8.1.                                                                                                                                           | Presentation of the products                                                                               |                                         |                                        |                                  | 10                              |
| 8.2.                                                                                                                                           | Propper food handling by the staff                                                                         |                                         |                                        |                                  | 10                              |
| 8.3.                                                                                                                                           | Staff wears correct uniform                                                                                |                                         |                                        |                                  | 10                              |
| 8.4.                                                                                                                                           | The staff uniform hygiene is correct                                                                       |                                         |                                        |                                  | 10                              |
| 9                                                                                                                                              | Higiene del mercado                                                                                        |                                         |                                        | -                                | 40                              |
| 9.1.                                                                                                                                           | Table, chairs and other surfaces cleanliness                                                               |                                         |                                        |                                  | 10                              |
| 9.2.                                                                                                                                           | Equipment cleanliness (displays, exhibitors)                                                               |                                         |                                        |                                  | 10                              |
| 9.3.                                                                                                                                           | Structure cleanliness (floors, ceilings, stalls...)                                                        |                                         |                                        |                                  | 10                              |
| 9.4.                                                                                                                                           | General hygiene of the market                                                                              |                                         |                                        |                                  | 10                              |
| 10                                                                                                                                             | Overall evaluation                                                                                         |                                         |                                        | -                                | 10                              |
| 10.1.                                                                                                                                          | Satisfaction general level                                                                                 |                                         |                                        | 10                               | 10                              |
| Total score                                                                                                                                    |                                                                                                            |                                         |                                        | -                                | 210                             |
| 11.                                                                                                                                            | Please, mark the main difference that you found between a traditional street market and a shopping centre. |                                         |                                        |                                  |                                 |
| 11.1.                                                                                                                                          | Price                                                                                                      |                                         |                                        |                                  |                                 |
| 11.2.                                                                                                                                          | Hygine                                                                                                     |                                         |                                        |                                  |                                 |
| 11.3.                                                                                                                                          | Freshness and quality                                                                                      |                                         |                                        |                                  |                                 |
| 11.4.                                                                                                                                          | Personal Assistance                                                                                        |                                         |                                        |                                  |                                 |
| 11.5.                                                                                                                                          | Local products                                                                                             |                                         |                                        |                                  |                                 |
| 11.6.                                                                                                                                          | Habit/ Proximity/ Convenience                                                                              |                                         |                                        |                                  |                                 |
| Many thanks for your collaboration                                                                                                             |                                                                                                            |                                         |                                        |                                  |                                 |
